# Supplementary material for: Depletion or cleavage of cohesin during anaphase differentially affects chromatin structure and segregation
Source: eLife journal article supplement (doi:10.7554/elife.80147), 2022-10-05
Supplement: fig3-data2 [file elife-80147-fig3-data2-v2.zip]

$\alpha$ -FLAG

$\alpha$ -HA

1

1250 1000 750 500 250 125

1250 1000 750 500 250 125

1250 1000 750 500 250 125

1250 1000 750 500 250 125

1250 1000 750 500 250 125

1250 1000 750 500 250 125

1250 1000 750 500 250 125

1250 1000 750 500 250 125

1250 1000 750 500 250 125
