# Supplementary figures and images for: Depletion or cleavage of cohesin during anaphase differentially affects chromatin structure and segregation
Source: eLife journal article supplement (doi:10.7554/elife.80147), 2022-10-05

$\alpha$ MYC

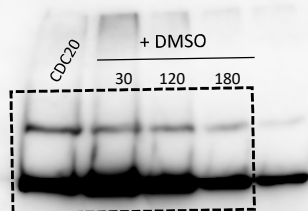

$\alpha$ PGK1

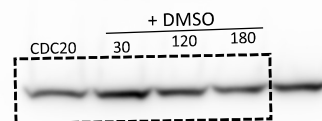

$\alpha$ MYC

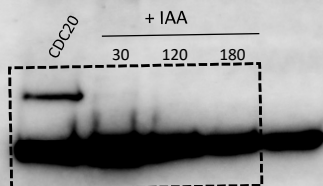

$\alpha$ PGK1

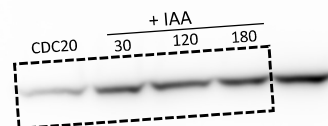

Supplement: fig1-data1 [file elife-80147-fig1-data1-v2.zip]

$\alpha$ MYC

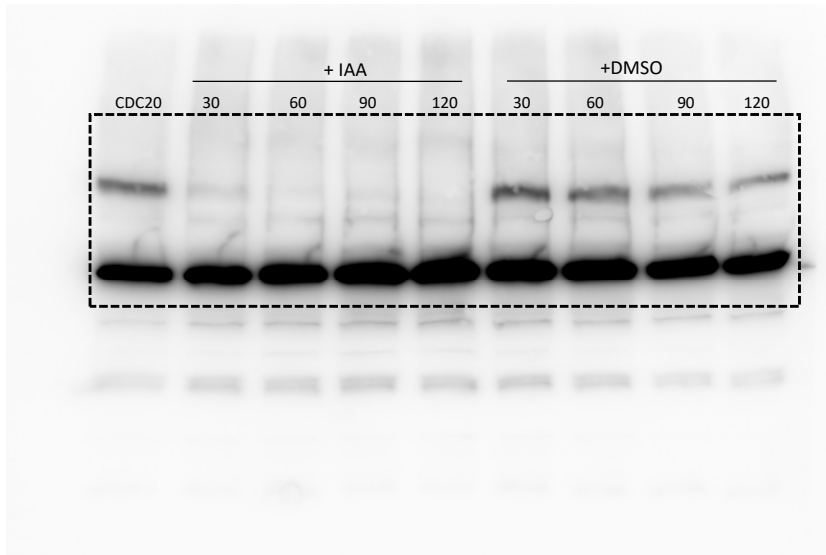

Supplement: fig1-figsupp1-data1 [file Figure 1_Figure_supplement_1-_source_data_1.pdf › Figure 1- Figure Supplement 1- Source data 1/Figure 1_Figure_supplement_1-_source_data_1.pdf]

$\alpha$ MYC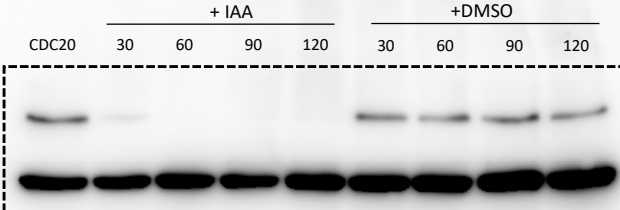

Supplement: fig1-figsupp1-data2 [file Figure 1_Figure_supplement_1-source_data_2.pdf › Figure 1- Figure Supplement 1- Source data 2/Figure 1_Figure_supplement_1-source_data_2.pdf]

12/22/00  
30 60 90 120 150 180  
+GAL

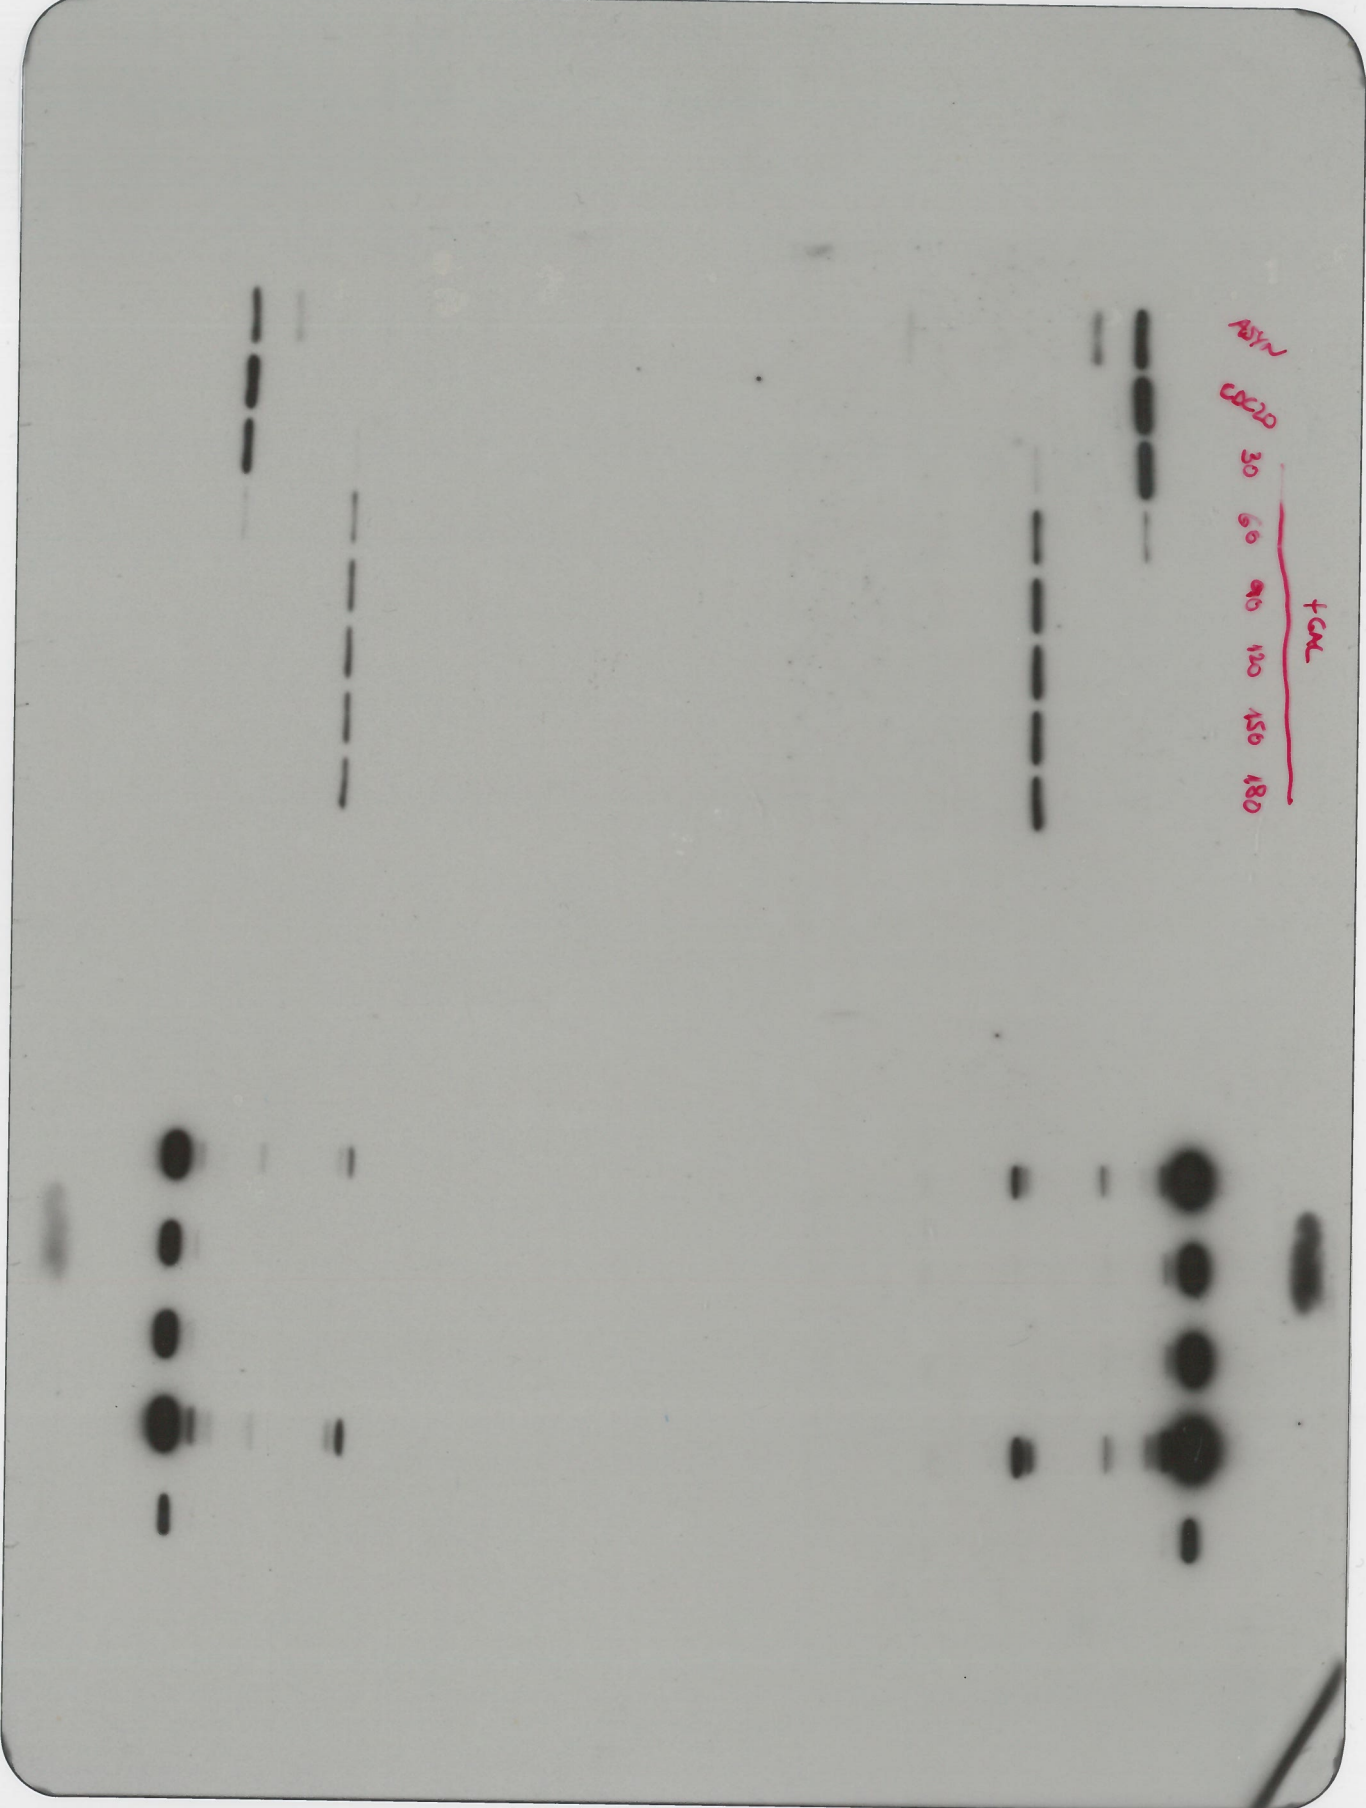

Supplement: fig1-figsupp2-data1 [file 2a WB TEVG nasmyth.pdf › Figure 1- Figure Supplement 2- Source data 1/2a WB TEVG nasmyth.pdf]

$\alpha$ HA

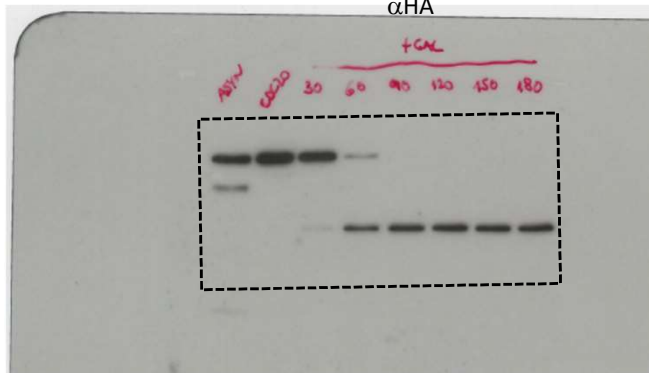

Supplement: fig1-figsupp2-data1 [file Figure 1_Figure_supplement_2-_Source_data_1.pdf › Figure 1- Figure Supplement 2- Source data 1/Figure 1_Figure_supplement_2-_Source_data_1.pdf]

WCE K4A  
MET 30 1h 1h30 2h

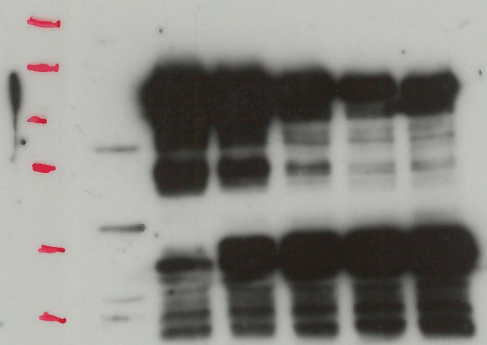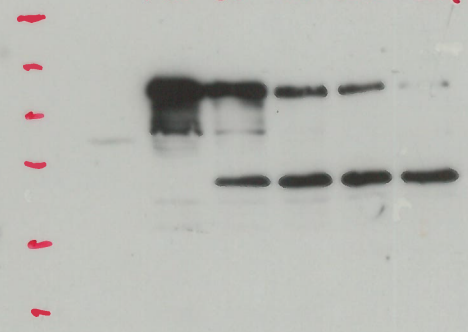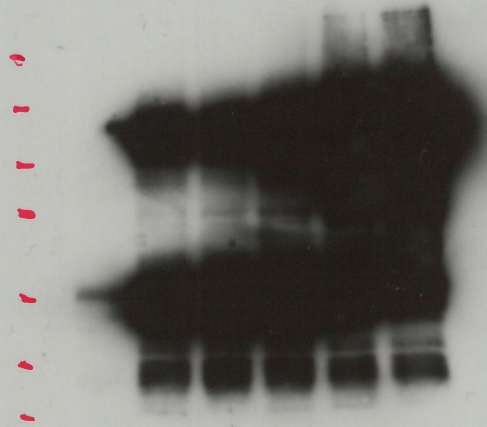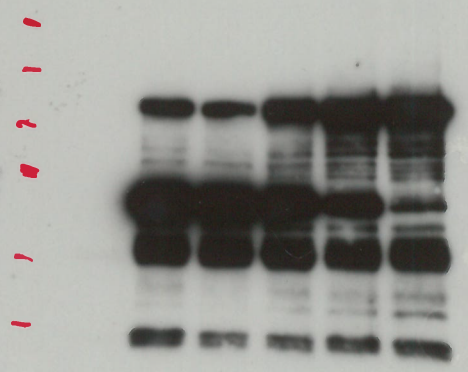

IP  $\alpha$  FLAG

4000 2h 1h30 1h 30' MET

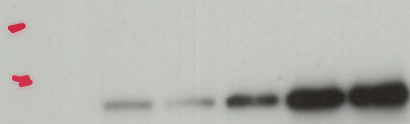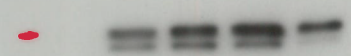

Supplement: fig2-data1 [file Fig 2_aFLAG.IP_aHA.WCE.pdf › Figure 2- Source data 1/Fig 2_aFLAG.IP_aHA.WCE.pdf]

$\alpha$  FLAG  
 MBT 30 1h 1h30 2h

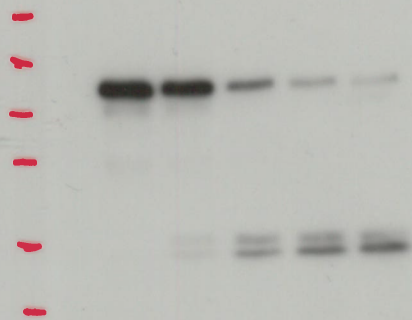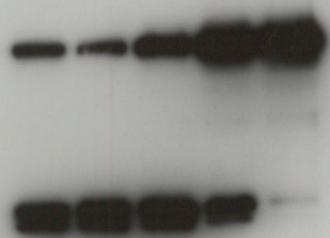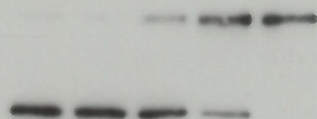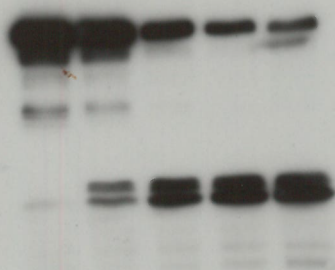

$\alpha$  HA IP  
 2h 1h30 1h 30 MBT

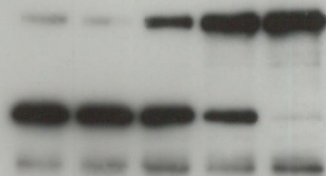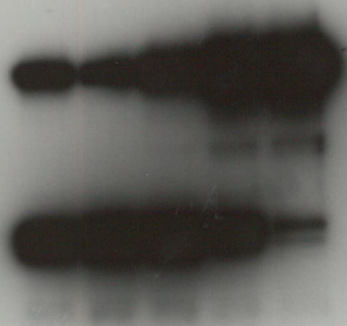

Supplement: fig2-data1 [file Fig 2_aFLAG.WCE_aHA.IP.pdf › Figure 2- Source data 1/Fig 2_aFLAG.WCE_aHA.IP.pdf]

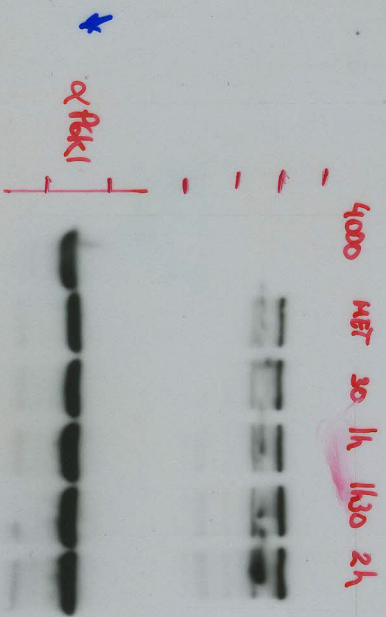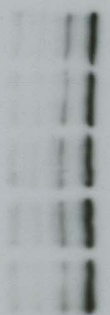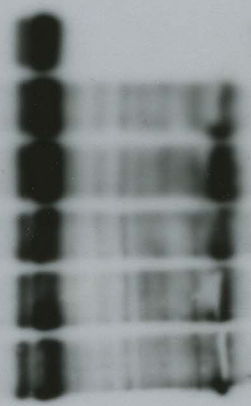

Supplement: fig2-data1 [file Fig 2_aPgk1.pdf › Figure 2- Source data 1/Fig 2_aPgk1.pdf]

IF  $\alpha$  V5

4000 2h 1h30 1h 30' NET

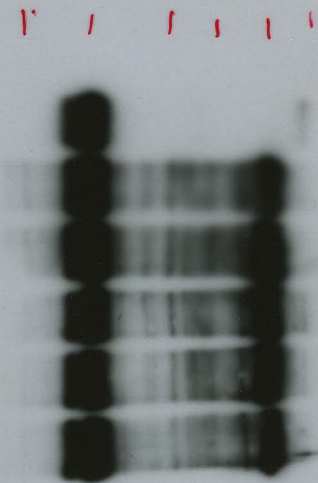

\*

<sup>H4</sup>  
VLC

+GAL

NET 30 1h 1h30 2h

$\alpha$  V5

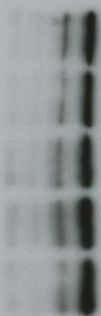

\*  $\alpha$  V5

$\alpha$  H4

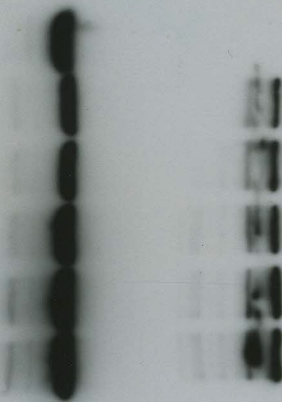

1 1 1 1 1 1

Supplement: fig2-data1 [file Fig 2_aV5.IP.pdf › Figure 2- Source data 1/Fig 2_aV5.IP.pdf]

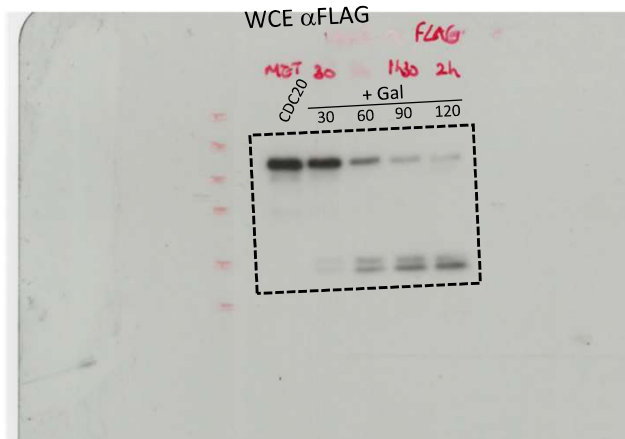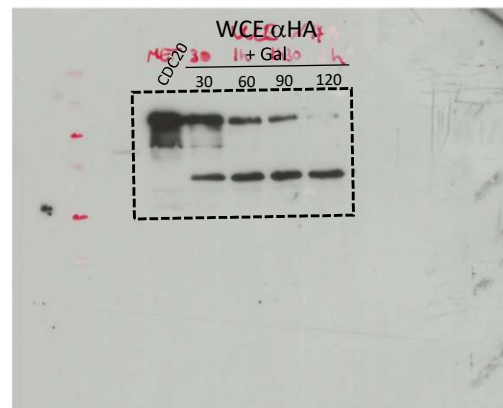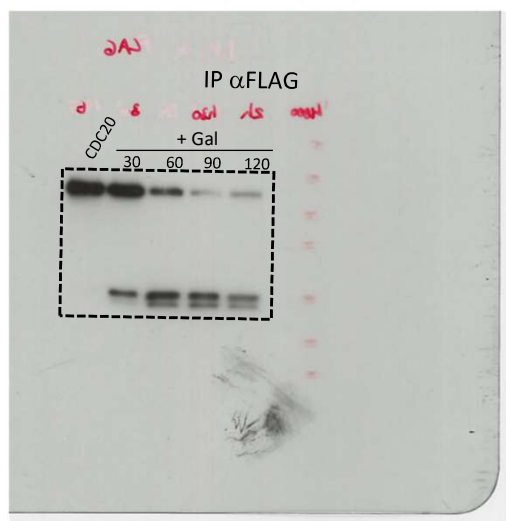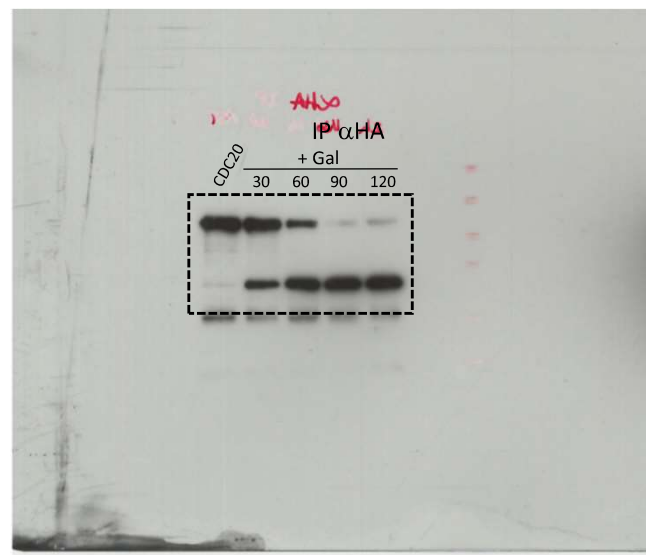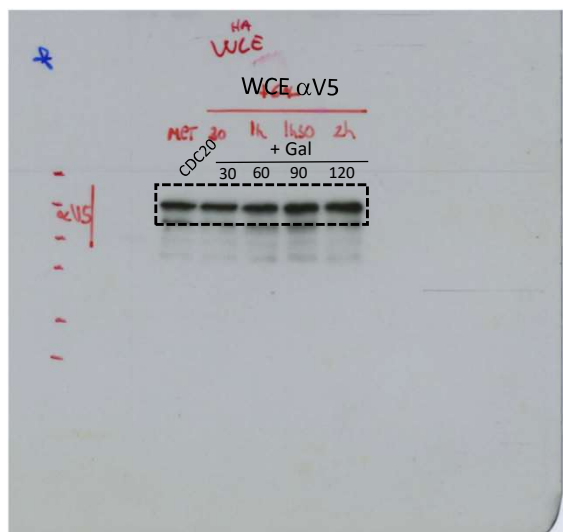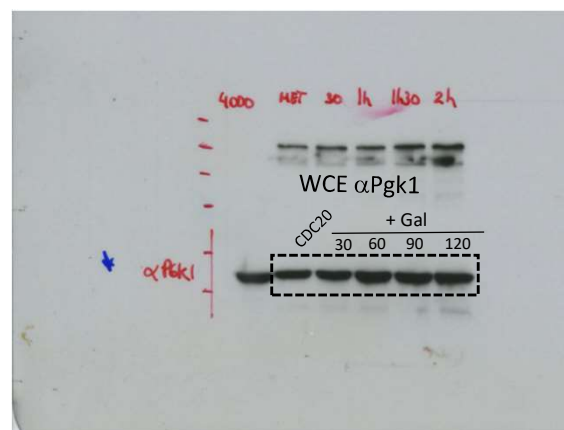

Supplement: fig2-data1 [file Figure_2_-Source_data_1.pdf › Figure 2- Source data 1/Figure_2_-Source_data_1.pdf]

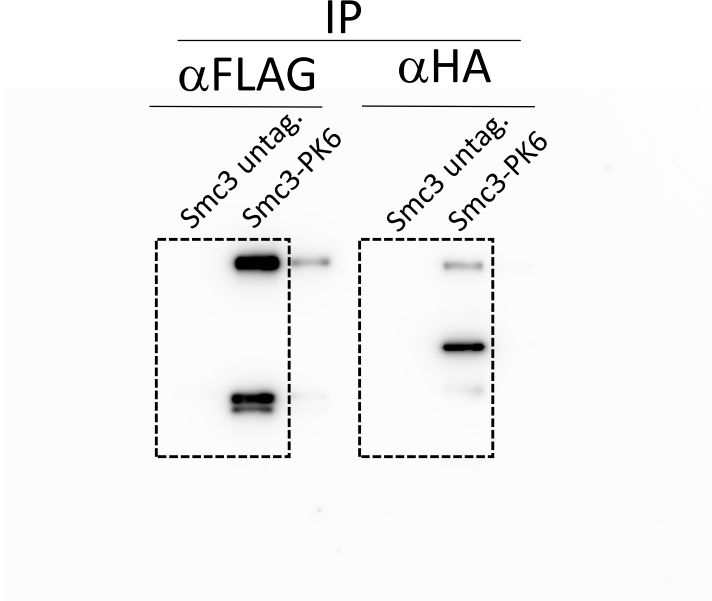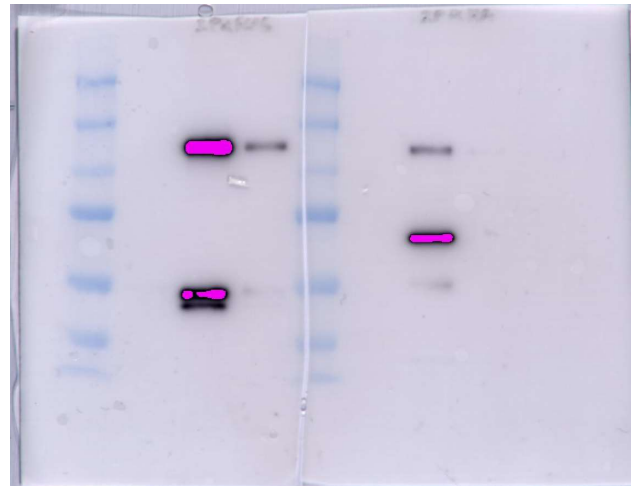

IP  $\alpha$ Smc3-V5

WCE

$\alpha$ V5

Smc3 untag.  
Smc3-PK6

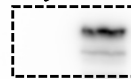

IP  $\alpha$ Smc3-V5

WCE

$\alpha$ HA

Smc3 untag.  
Smc3-PK6

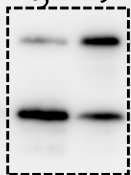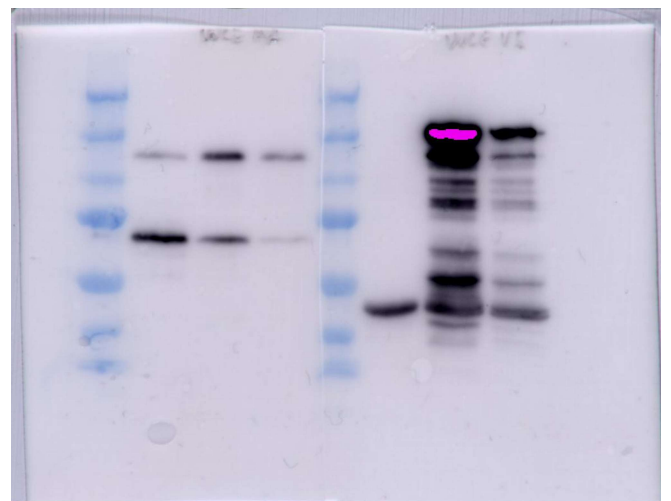

Supplement: fig2-figsupp1-data1 [file Figure 2_Figure_supplement_1-_source_data_1.pdf › Figure 2- Figure Supplement 1- Source data 1/Figure 2_Figure_supplement_1-_source_data_1.pdf]

α PLAG

α-HA

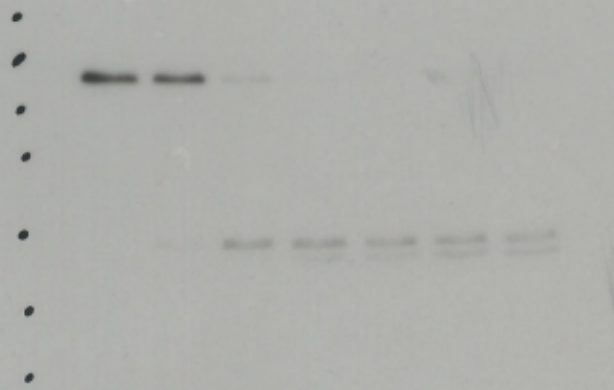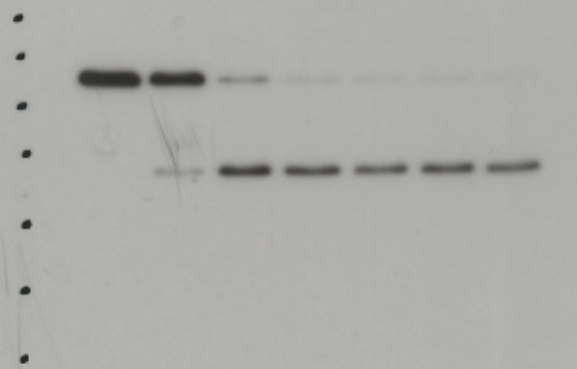

1

+

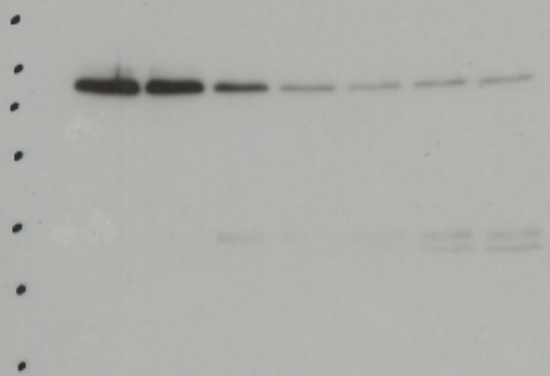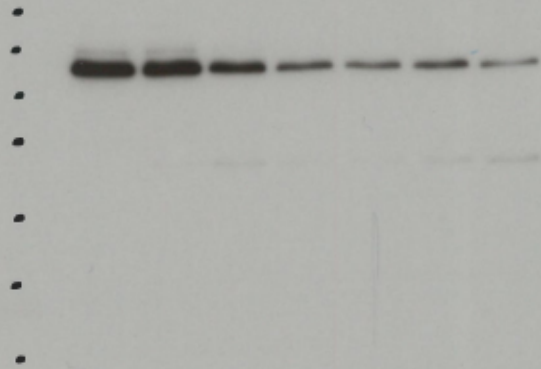

Supplement: fig3-data1 [file elife-80147-fig3-data1-v2.zip]

$\alpha$ FLAG  
TEV-G

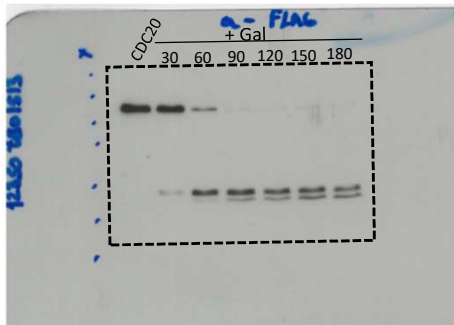

$\alpha$ HA  
TEV-G

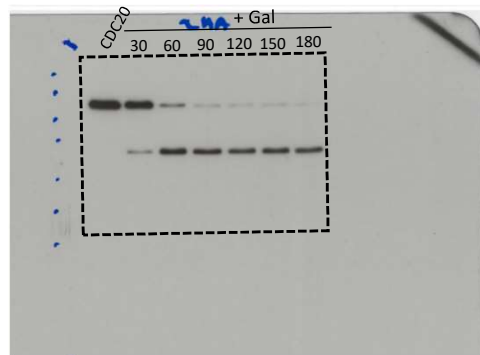

Supplement: fig3-data1 [file elife-80147-fig3-data1-v2.zip]

$\alpha$ FLAG  
TEV-F

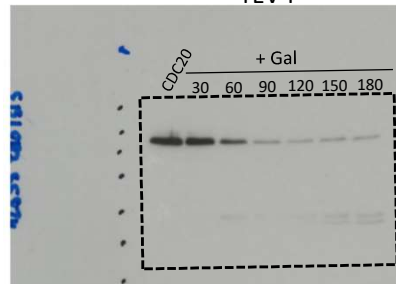

$\alpha$ HA  
TEV-F  
+ Gal

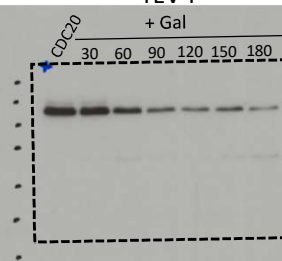

Supplement: fig3-data2 [file elife-80147-fig3-data2-v2.zip]

$\alpha$ FLAG

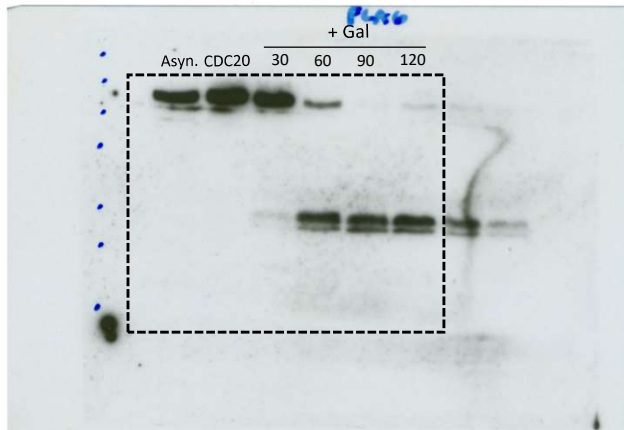

$\alpha$ HA

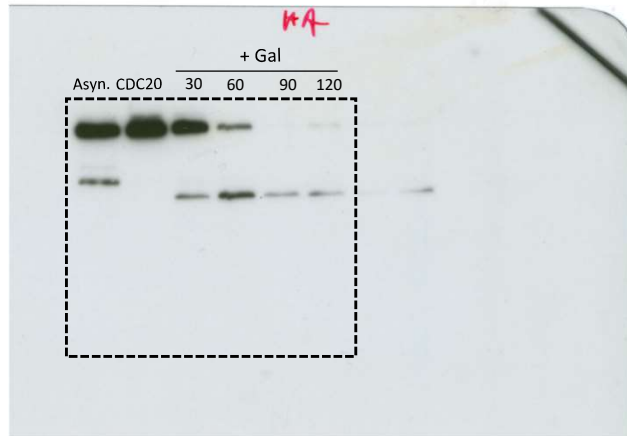

Supplement: fig4-figsupp1-data1 [file Figure 4_Figure_supplement_1-source_data_1.pdf › Figure 4- Figure Supplement 1- Source data 1/Figure 4_Figure_supplement_1-source_data_1.pdf]

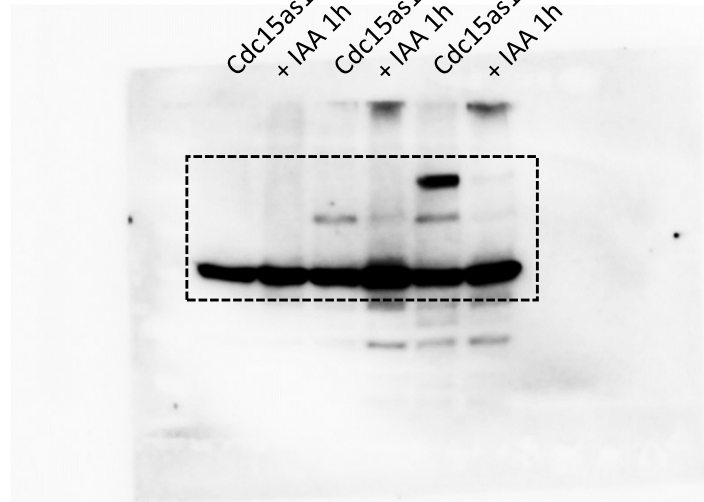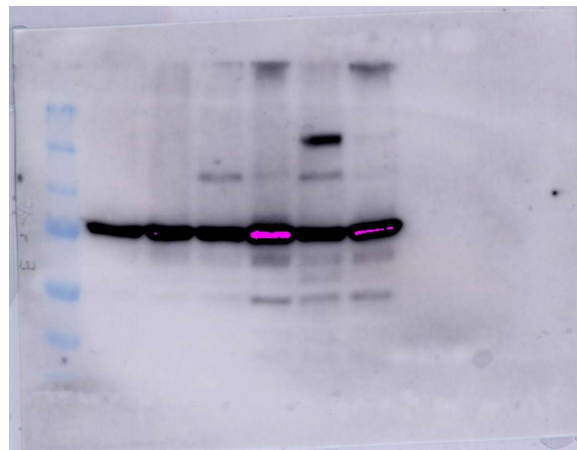

Supplement: fig6-data1 [file Figure_6-_source_data_1.pdf › Figure 6- Source data 1/Figure_6-_source_data_1.pdf]
